---

Corrigendum

## CGManalyzer: an R package for analyzing continuous glucose monitoring studies

Xiaohua Douglas Zhang, Zhaozhi Zhang and Dandan Wang

---

*Bioinformatics*, (2018) <https://doi.org/10.1093/bioinformatics/btx826>

The authors of the above paper wishes to inform readers that the link provided for the source file *CGManalyzer\_1.0.tar.gz* is no longer correct. The source file is now available at [https://quantitativelab.fhs.](https://quantitativelab.fhs.umac.mo/analytic-tool/)

[umac.mo/analytic-tool/](https://quantitativelab.fhs.umac.mo/analytic-tool/). An error in the file *CGManalyzer\_1.0.tar.gz* available as [supplementary data](#) at *Bioinformatics* online has also been corrected.

The paper has now been corrected online.
